# Supplementary material
Source: PubMed Central journal article supplement (PMC3072762)

### Supplementary Figure 3

**A**

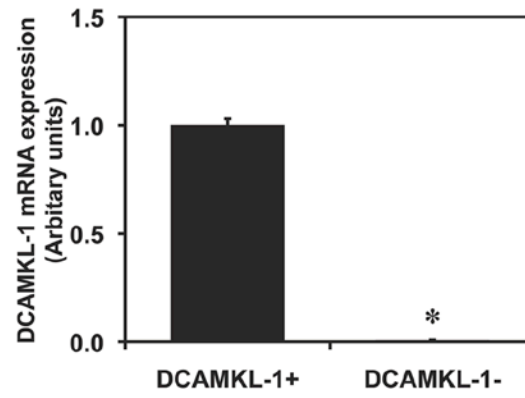

**B**

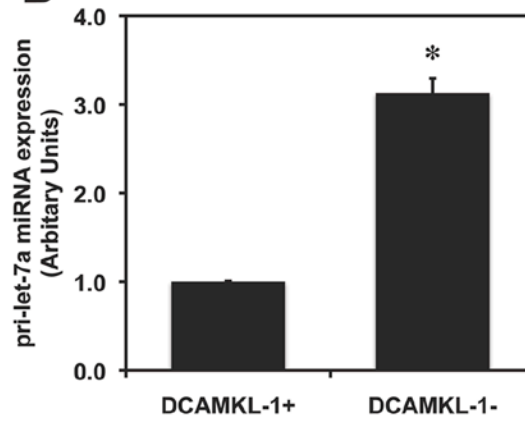

**C**

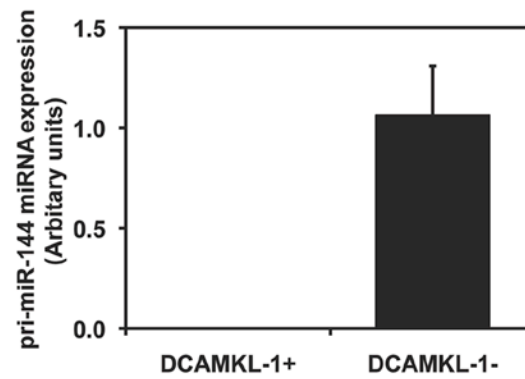

Supplement: NIHMS269545-supplement-3.pdf [file NIHMS269545-supplement-3.pdf]

# Supplementary Figure 4

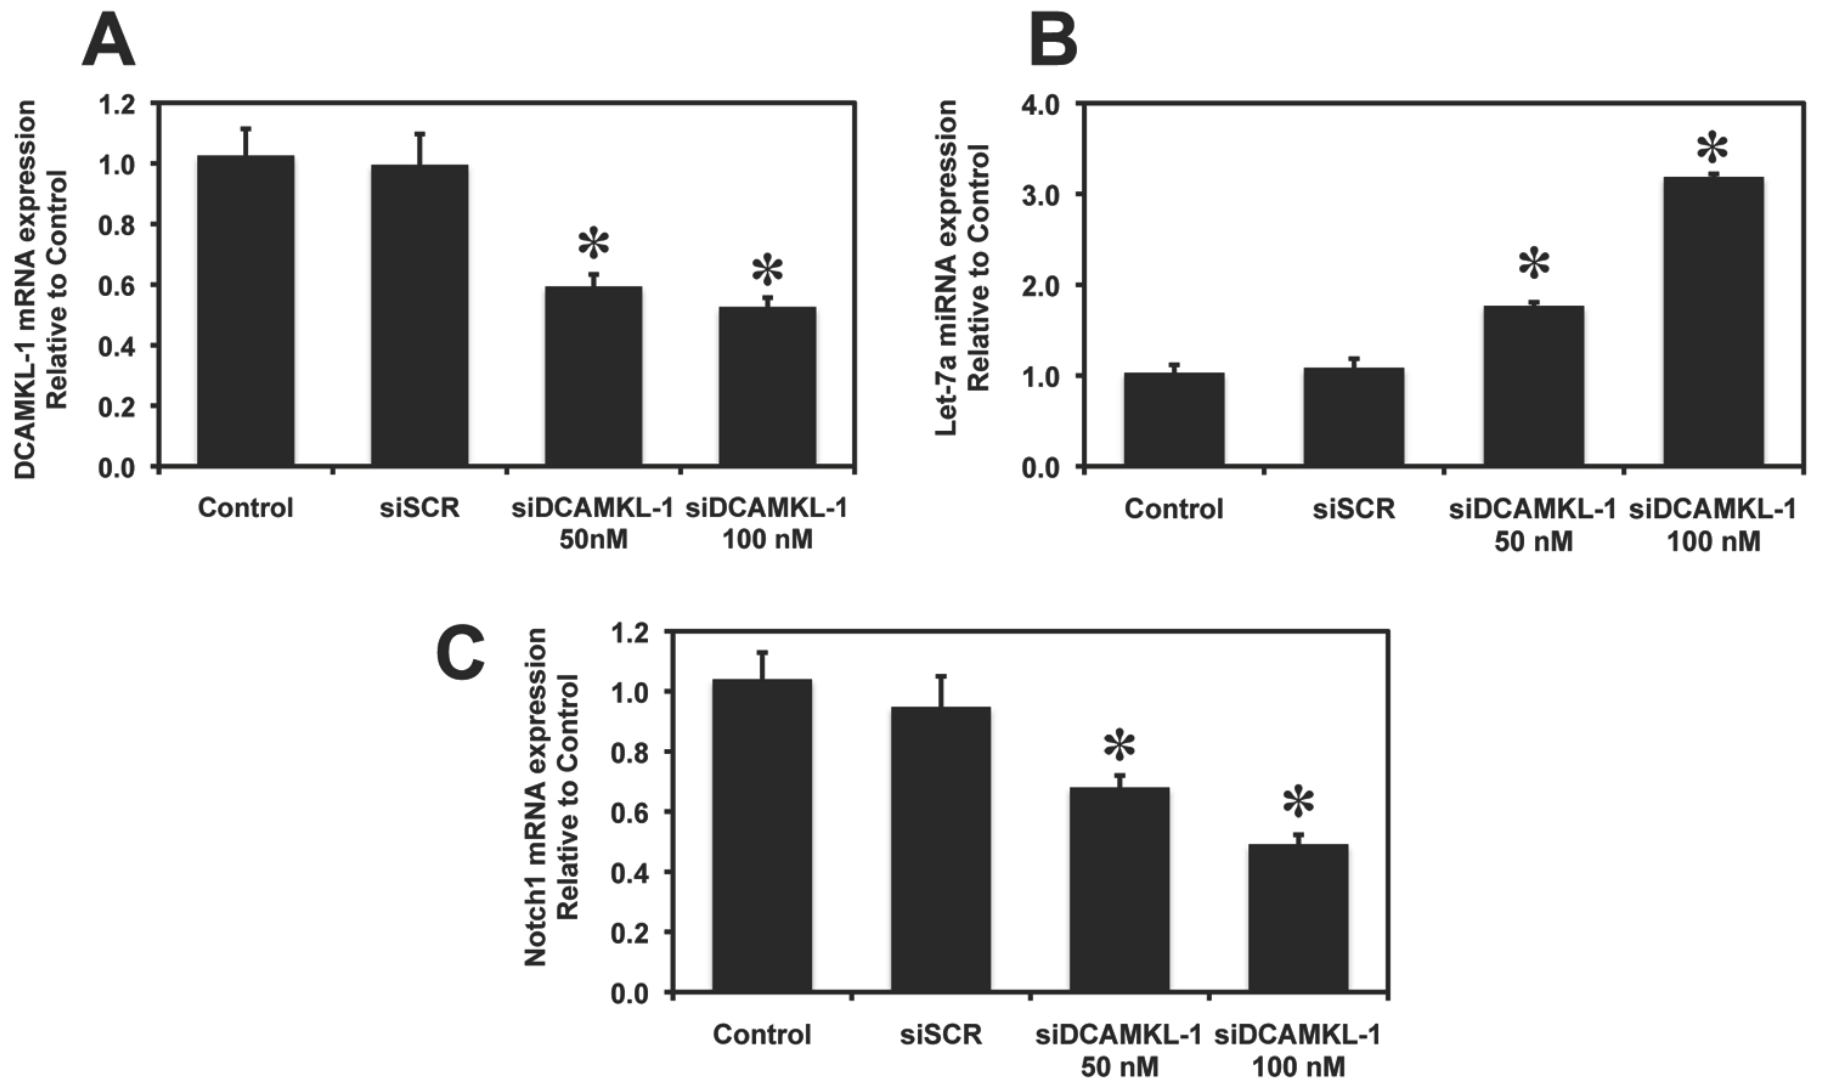

Supplement: NIHMS269545-supplement-4.pdf [file NIHMS269545-supplement-4.pdf]
